# Supplementary material for: Chlorogenic Acid of Cirsium japonicum Resists Oxidative Stress Caused by Aging and Prolongs Healthspan via SKN-1/Nrf2 and DAF-16/FOXO in Caenorhabditis elegans
Source: MDPI journal article supplement (doi:10.3390/metabo13020224), 2023-02-03
Supplement: s1 [file s1]

**Table S1.** High performance liquid chromatography (HPLC) analysis condition of phenolic compounds from CJ.

| HPLC (UltiMate 3000, Thermo Scientific, CA, USA) |                                                                                                                                                                                                                                                        |
|--------------------------------------------------|--------------------------------------------------------------------------------------------------------------------------------------------------------------------------------------------------------------------------------------------------------|
| Column                                           | Waters symmetry C18 column (Waters, 4.6 × 150 mm, 5 μm)                                                                                                                                                                                                |
| Solvent                                          | (A) acetonitrile<br>(B) 0.02% (v/v) aqueous phosphoric acid<br>Gradient: 87% solvent B for 6 min, 85–87% solvent B for the next 3 min, 81–85% solvent B for 17 min, 72–81% solvent B for 28 min and a linear step from 72 to 87% solvent B for 12 min. |
| Column temperature                               | 35 °C                                                                                                                                                                                                                                                  |
| Wavelength                                       | 340 nm                                                                                                                                                                                                                                                 |
| Flow rate                                        | 1.0 mL/min                                                                                                                                                                                                                                             |

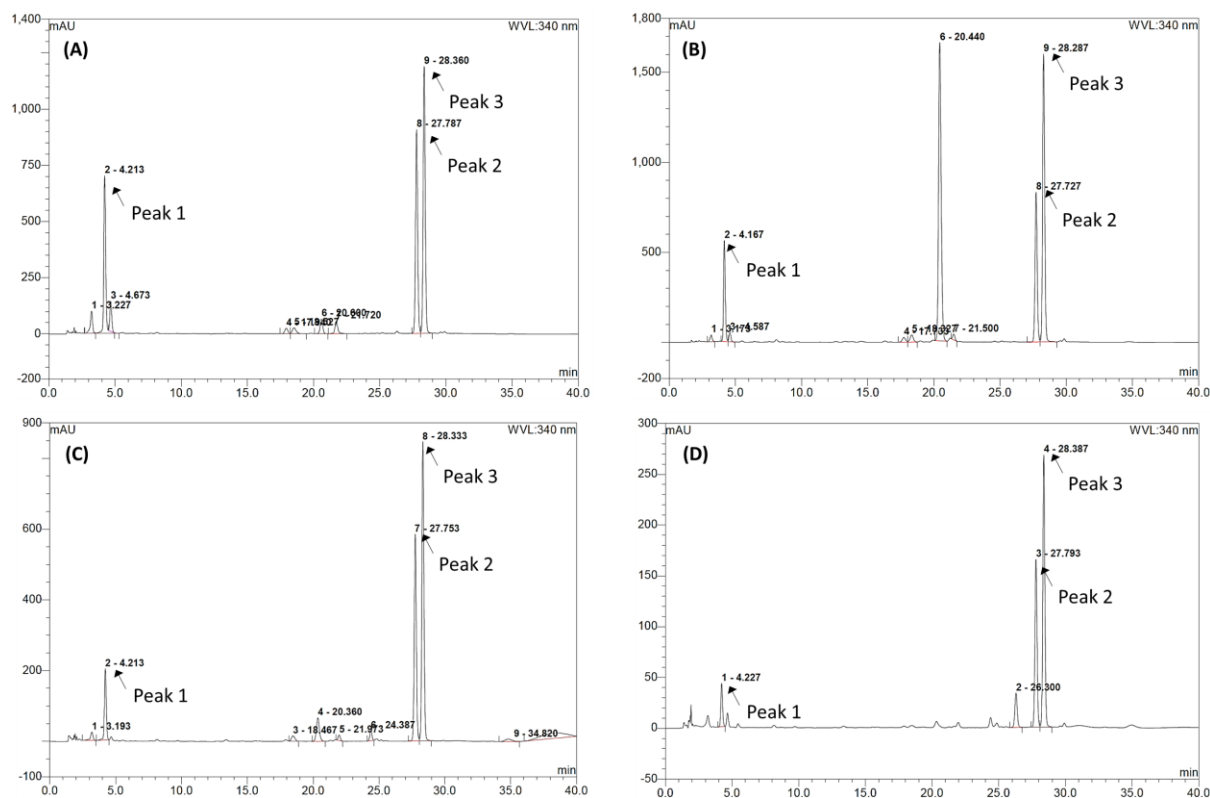

**Figure S1.** High performance chromatography profiles of phenolics in CJ collected from four different regions in Korea. (A) Pocheon, (B) Goheung, (C) Jeju, and (D) Yesan. peak 1: chlorogenic acid, peak 2: linarin and peak 3: pectolinarin.

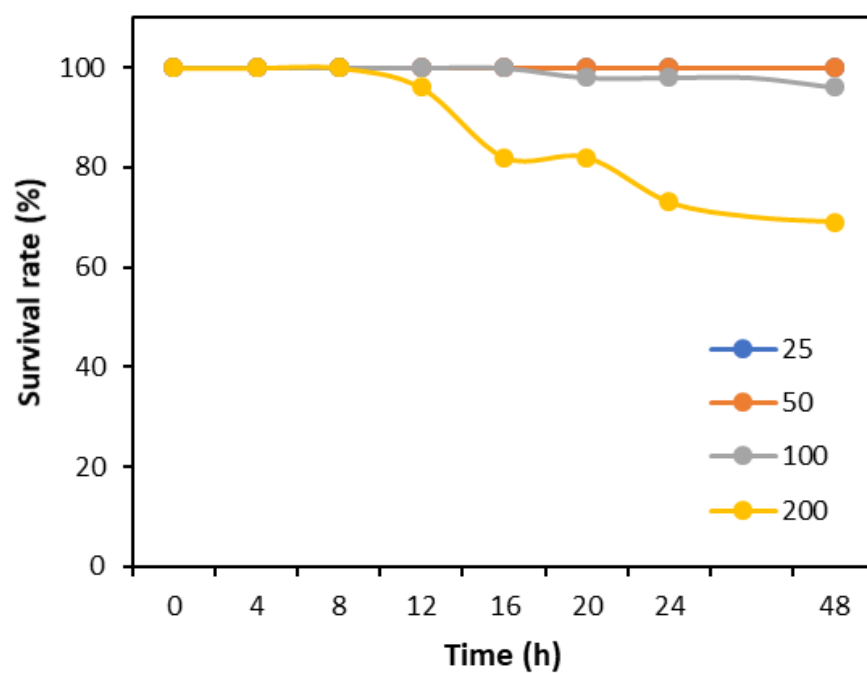

**Figure S2.** Acute toxicity by the concentrations of chlorogenic acid (CA). *C. elegans* was treated with CA at a concentration of 25-200 µg/mL.
